# Supplementary material for: Physiological Sources of Essential Lipids for Mycoplasma pneumoniae via Protein P116: Innovative Biotechnological Tools for Targeting Atherosclerotic and Hepatic Lesions
Source: Research Square preprint supplement (doi:10.21203/rs.3.rs-5668698/v1), 2025-01-08
Supplement: Supplementary file 1 [file 726ca86bfdcc754b1ebe9d76.docx]

Physiological Sources of Essential Lipids for *Mycoplasma pneumoniae* via Protein P116: Localization and Innovative Biotechnological Tools for Targeting Atherosclerotic Lesion

David Vizarraga1,*, Marina Marcos2,*, Noemi Rotllan3,4,*, Jesús Martín1, David Santos3,4, Mercedes Camacho3,5, Pablo Guerra6, Félix Pareja7, María Collantes8,9, Wanlu Wu2, Irene Rodríguez-Arce10, Luis Serrano10,11, Jaume Piñol2, #, Ignacio Fita1,# and Joan Carles Escolà-Gil3,4,#

**Supplementary Figure 1: page 2**

**Supplementary Figure 2: page 4**

**Supplementary Figure 3 page 5**

**Supplementary Figure 4: page 6**

**Supplementary Figure 5: page 7**

**Supplementary Figure 6: page 8**

**Supplementary Table 1: page 9**

**Supplementary Table 2: page 10**

**Supplementary Table 3: page 12**

**Supplementary Table 4: page 34**

**
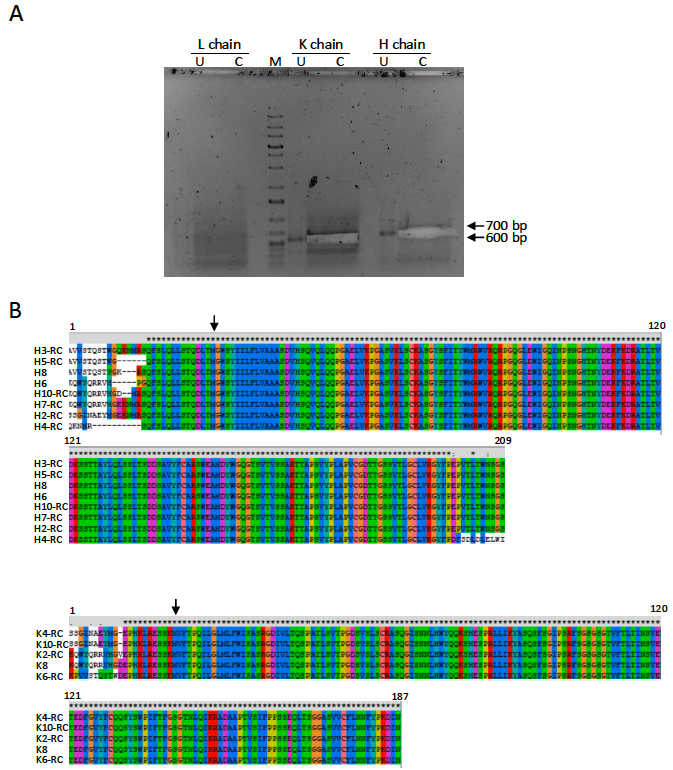
**

**Supplementary figure 1: Sequence analysis of the coding cDNAs and amino acid sequences for the CDS of heavy and light chains in hybridoma cells producing the P116-mAb-3G9.** (A) Agarose gel electrophoresis of RT-PCR products corresponding to the cDNAs of the heavy chain (H), kappa light chain (K), and lambda light chain (L). Lanes were loaded with 5 µL (U) or 45 µL (C) of the RT-PCR products. The C lanes from the K and H chain reactions were excised from the gel (indicated by arrows at ~700 bp and ~600 bp, respectively). The M lane contains the GeneRuler 1 kb Plus DNA Ladder (Thermo Fisher Scientific). (B) ClustalX alignment of the deduced amino acid sequences for the heavy chain (H3 to H10) and kappa light chain (K2, K4, K6, K8, and K10). "RC" indicates that the DNA sequence used for translation into amino acids was the reverse complement of the original sequence. Arrows indicate the first methionine (Met) residue in each alignment.

**Supplementary figure 2: LDL and HDL composition.** Both lipoproteins were isolated from human normolipidemic plasma at 100,000 g for 24 hours at densities of 1.019–1.063 and 1.063–1.21 g/mL, respectively. Lipids and apoB and apoA1 levels were determined. Values are expressed as lipid concentration per milligram of apoB or apoA1 (mmol/mg) and correspond to lipoprotein preparations isolated from three independent samples.

**Supplementary figure 3: The transfer of unesterified cholesterol from LDL to P116W681A mutant is reduced.** Relative transfer of radiolabeled unesterified cholesterol from LDL (0.5 mg/mL) to P116W681A mutant (0.25 mg/mL) for 90 minutes at 37°C.

**
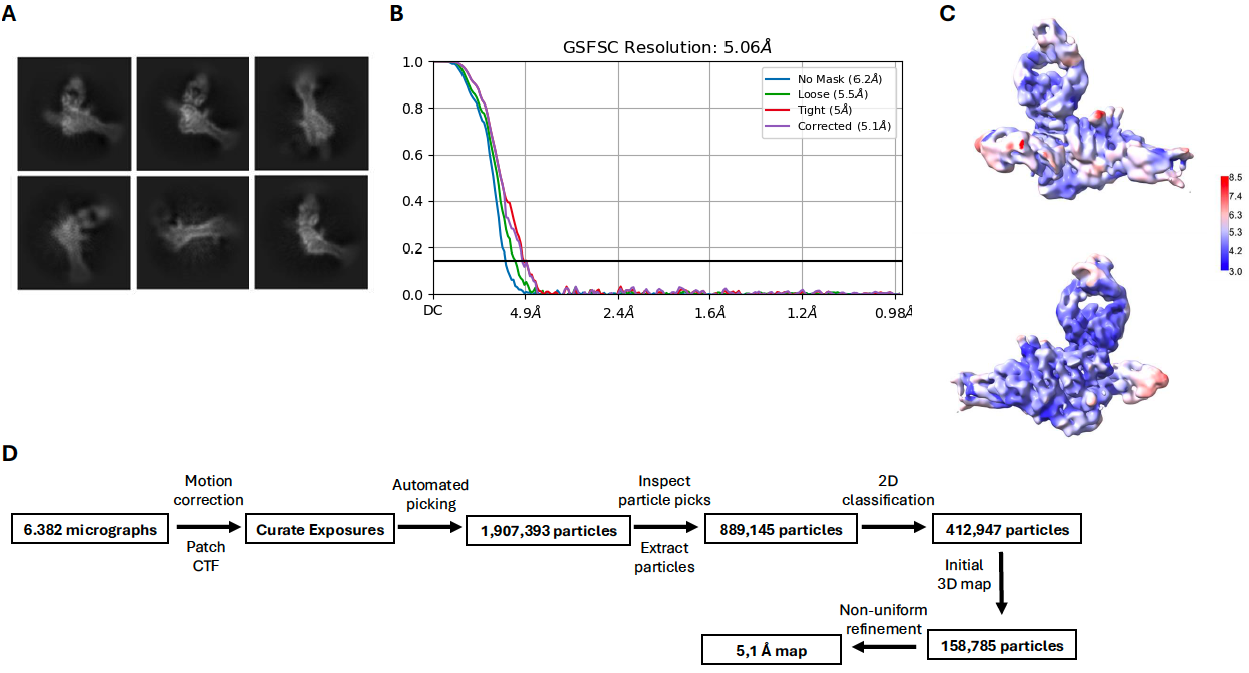
**

**Supplementary Figure 4: Cryo-EM analysis of the P116-mAb-3G9 complex.** (A) Representative 2D class averages of the P116-mAb-3G9 complex. (B) Fourier shell correlation (FSC) curve indicating a final resolution of 5.1 Å, based on the 0.143 cut-off criterion. (C) Local resolution estimation of the cryo-EM map. (D) Workflow schematic outlining the image processing steps for the P116-mAb-3G9 complex.


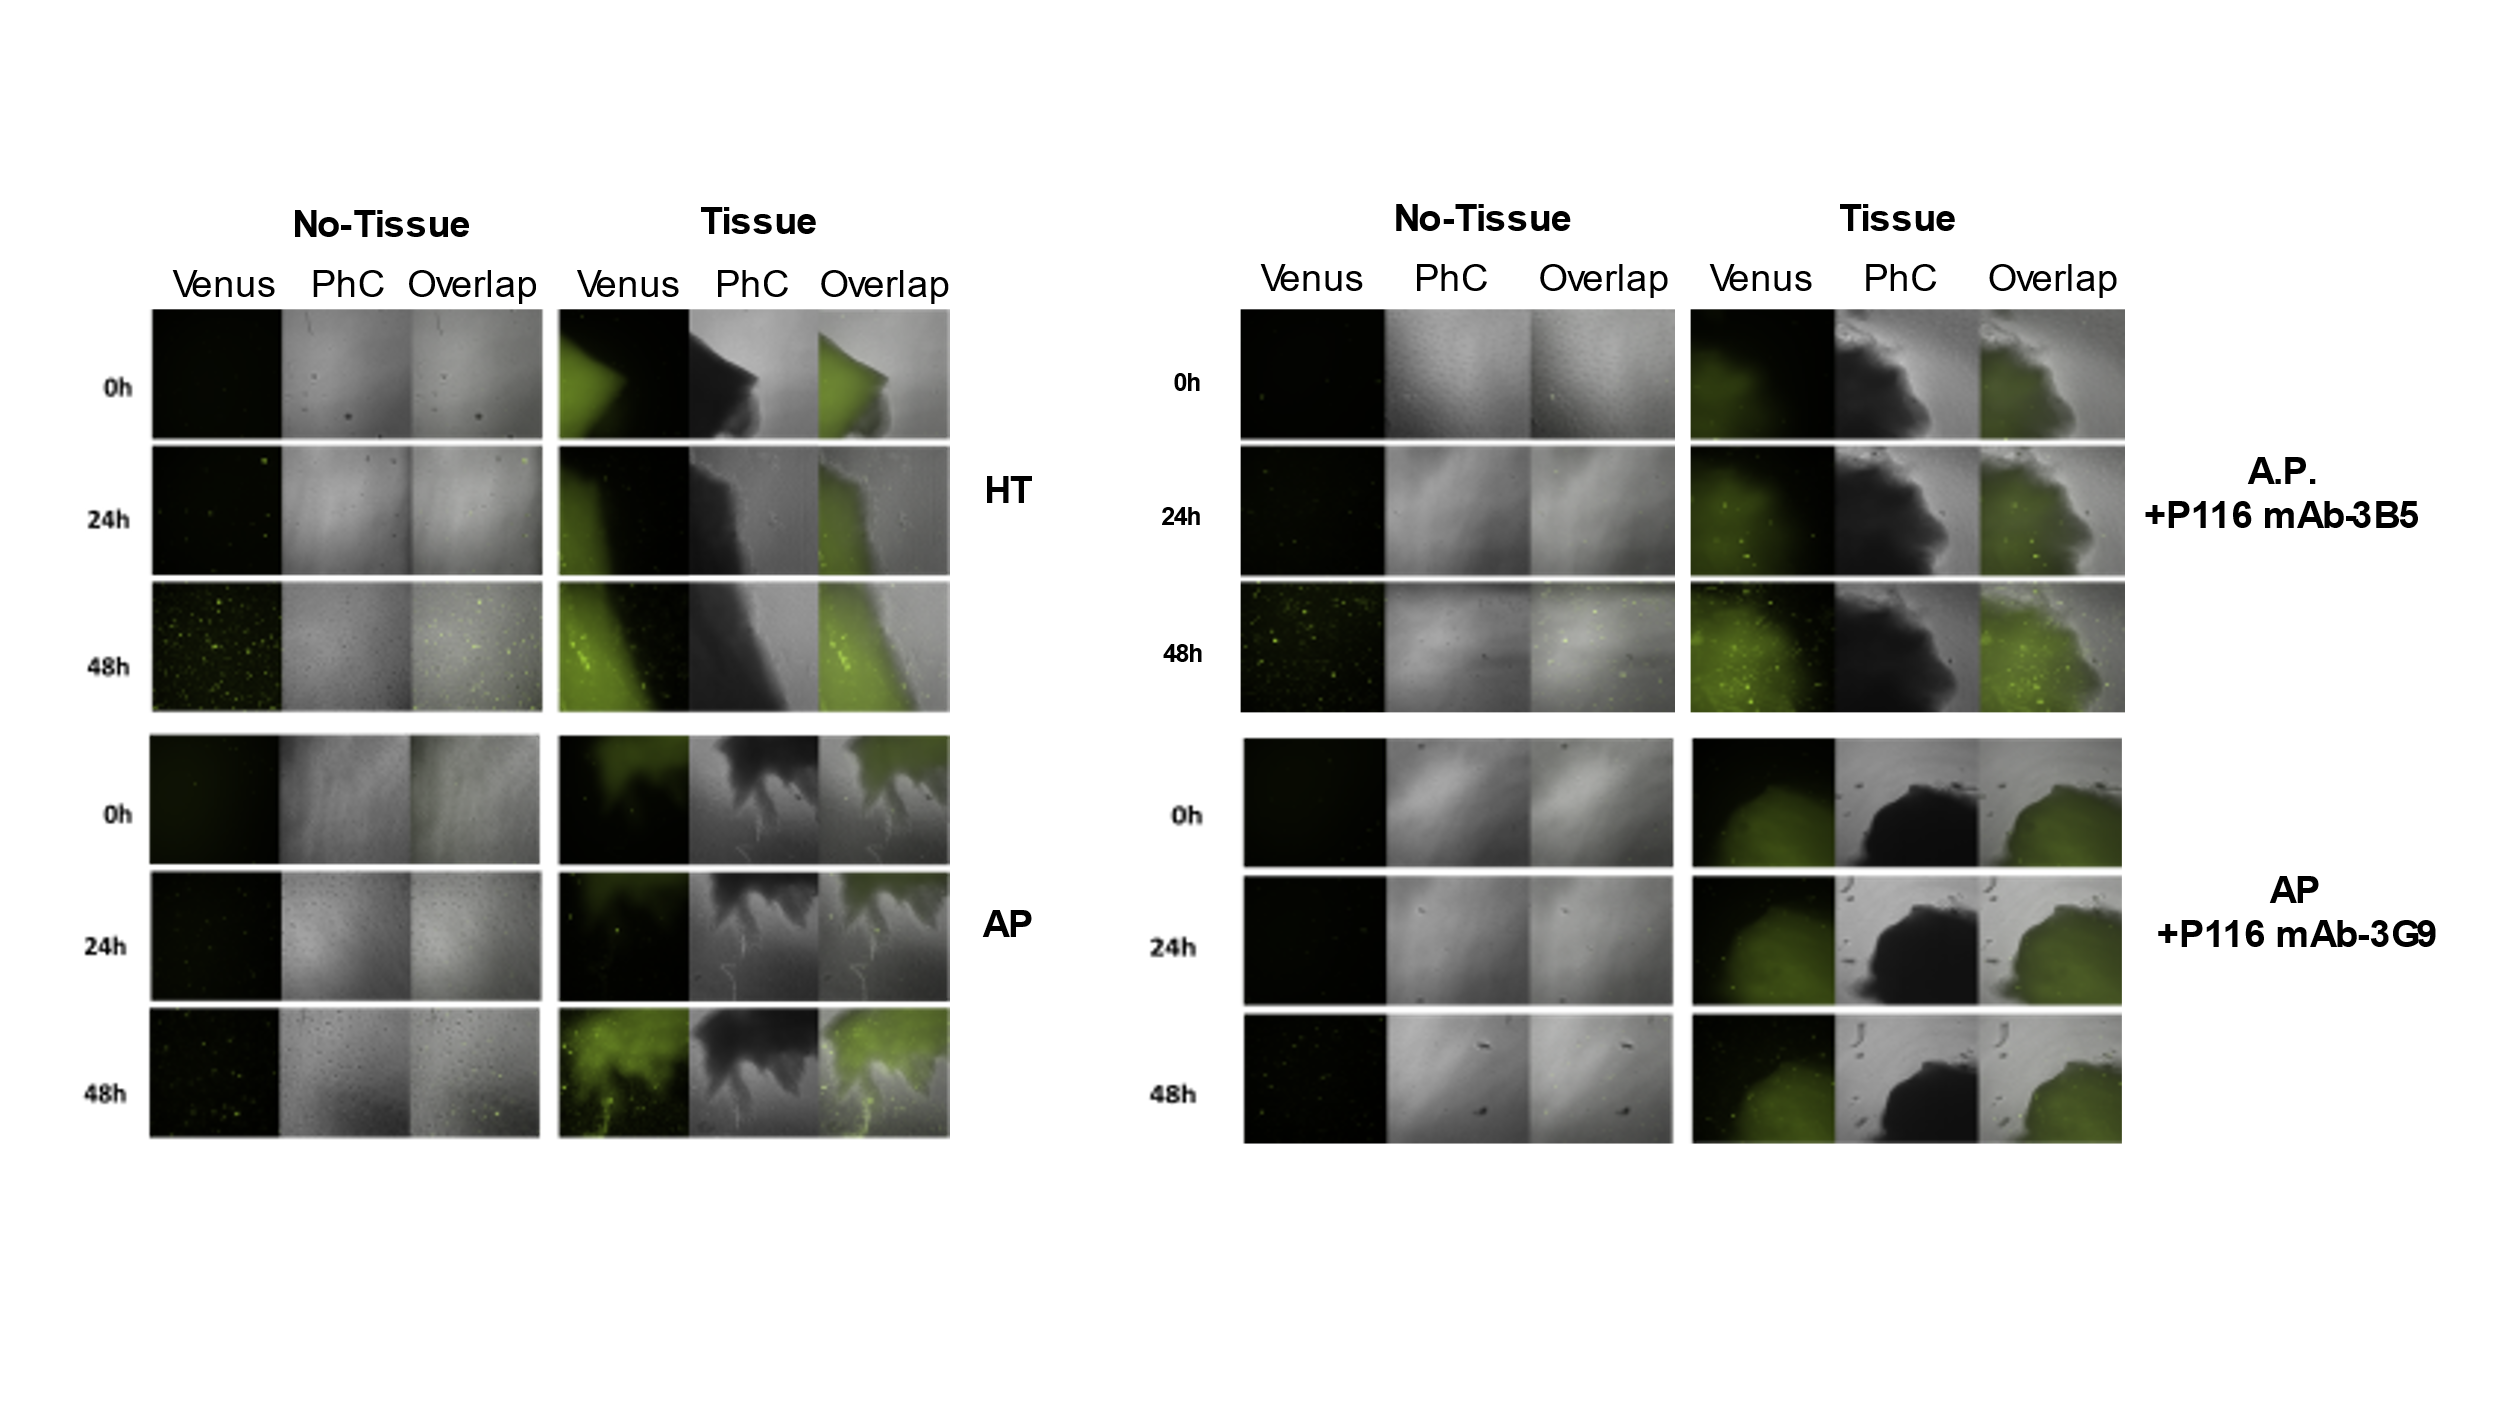
**Supplementary Figure 5: Monoclonal P116 Antibodies and Tropism of *MPN* to Human Atherosclerotic Plaques *ex Vivo*.** Phase contrast (PhC) epifluorescence microscopy images of *MPN* cells grown in the presence of healthy human non-atherosclerotic tissue (HT) or human atherosclerotic plaque tissue (AP), before and after incubation with P116 mAb-3G9 or P116 mAb-3B5. Images were captured at different time points: 0h, 24h and 48h after inoculation with *MPN* Venus strain cells. The left panels display images from plate areas without tissue (No-Tissue), while the right panels show images from plate areas where tissue was deposited and monitored (Tissue).


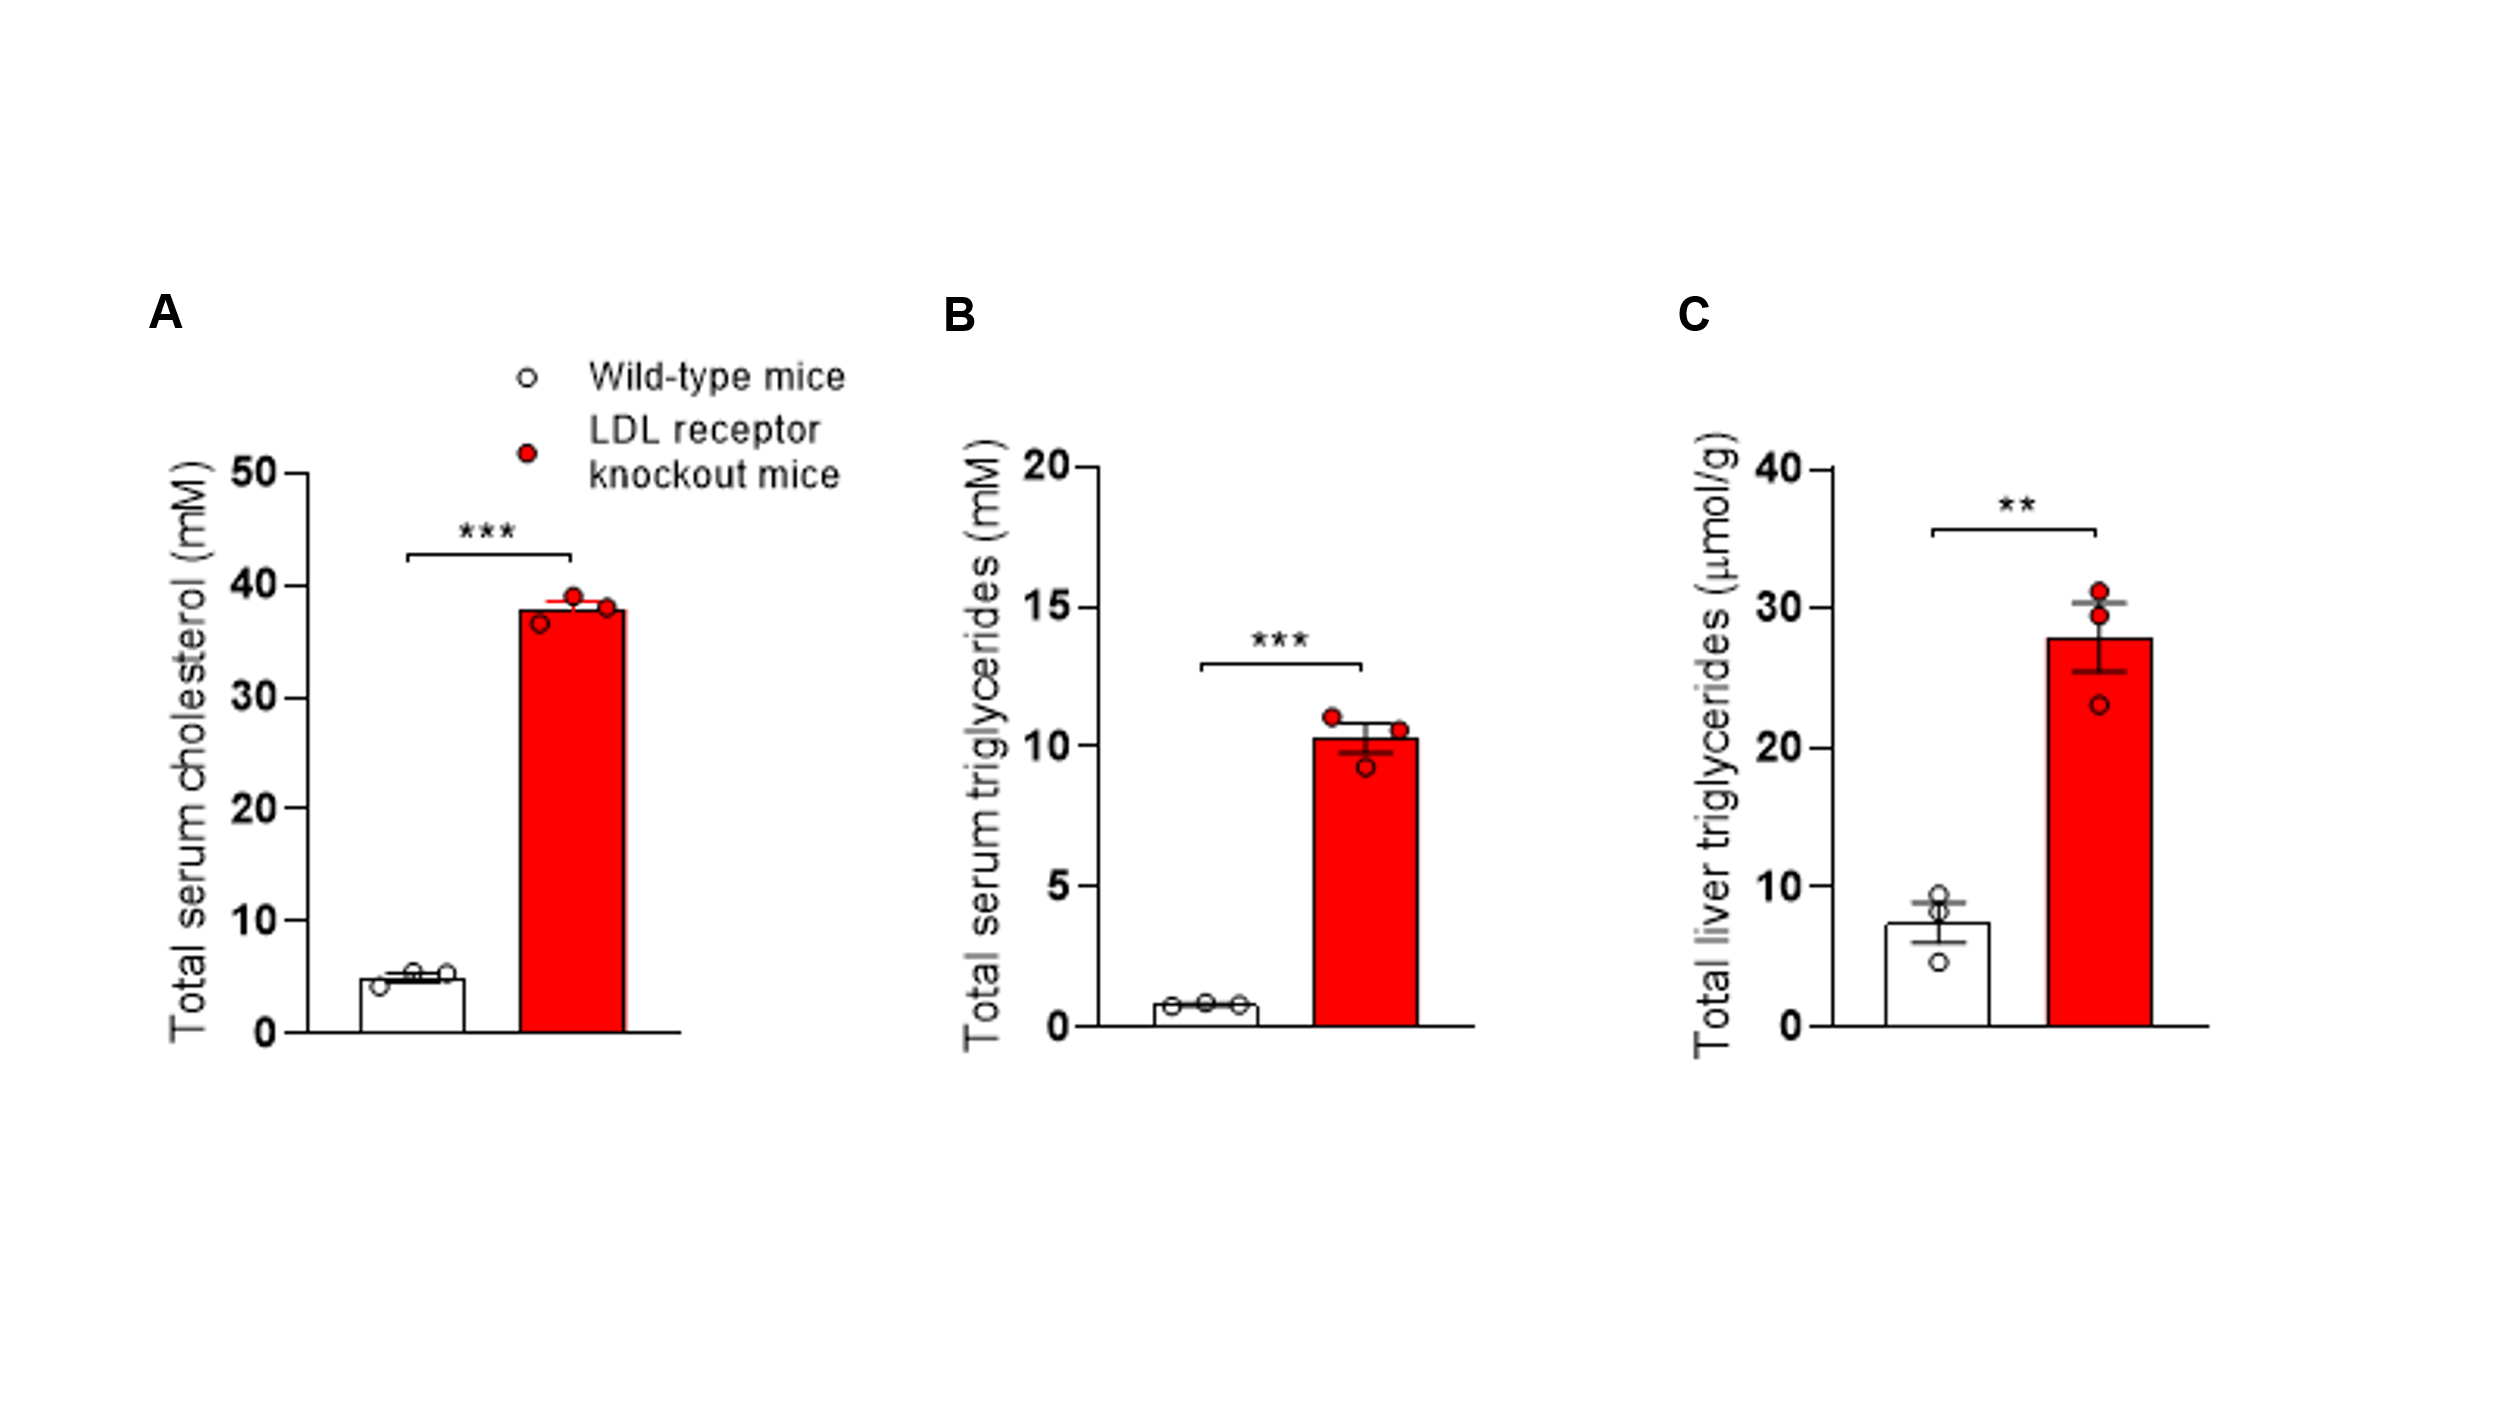
**Supplementary Figure 6: Increased levels of serum and liver lipids in LDL receptor knockout mice.** Serum total cholesterol (A) and triglycerides (B), and liver triglycerides (C) in wild-type and LDL receptor knockout mice fed a Western-type diet for 8 weeks.

Statistics: An unpaired t-test was performed to compare the different parameters between the two groups. ** and *** are P≤0.01, and 0.001 vs. wild-type, respectively.

|  | **Platform 1** | **Platform 2** |
| --- | --- | --- |
| **Column type** | UPLC BEH C18, 1.0 x  100 mm, 1.7 μm | UPLC BEH C18, 2.1 x 100  mm, 1.7 μm |
| **Flow rate** | 0.14 ml/min | 0.40 ml/min |
| **Solvent A** | H2O + 0.05% Formic Acid | H2O + ACN + 10mM  Ammonium Formate |
| **Solvent B** | ACN + 0.05% Formic Acid | ACN+ Isopropanol + 10mM Ammonium Formate |
| **(%B), time** | 0%, 0 min | 40%, 0 min |
| **(%B), time** | 50%, 2 min | 100%, 10 min |
| **(%B), time** | 100%, 13 min | 40%, 15 min |
| **(%B), time** | 0%, 18 min | 40%, 17 min |
| **Column temperature** | 40 °C | 60 °C |
| **Injection volume** | 2 μl | 3 μl |
| **Source temperature** | 120 °C | 120 °C |
| **Nebulization N2 flow** | 600 l / hour | 1000 l / hour |
| **Nebulization N2 temperature** | 350 °C | 500 °C |
| **Cone N2 flow** | 30 l / hour | 30 l / hour |
| **Capillary voltage** | 2.0 kV | 3.2 kV |
| **Cone voltage** | 50 V | 30 V |

**Supplementary Table 1**. UHPLC-MS analysis methods

**Supplementary Table 2.**

| **Data collection and processing** | **P116-mAb** |
| --- | --- |
| **Magnification** | 150000x |
| **Voltage (kV)** | 200 |
| **Electron exposure (e-/Å2)** | 38.76 |
| **Defocus range (μm)** | -1.8 to -2.8 |
| **Pixel size (Å)** | 0.96 |
| **Symmetry imposed** | C1 |
| **Initial particle images (no)** | 1.907.393 |
| **Final particle images (no)** | 412.947 |
| **Map Resolution** | 5.06 |
| **FSC threshold** | 0.143 |
| **Map resolution range (Å)** | 3.0 to 8.5 |
| **Refinement statistcs** |  |
| **Initial model used** | 8A9A (cryo-EM structure) |
| **Model resolution (Å)** | 6.8 |
| **FSC threshold** | 0.5 |
| **Model resolution range (Å)** | 2.0 to 6.8 |
| **Map sharpening B factor (Å2 )** | -300 |
| **Model composition** |  |
| **Nonhydrogen atoms** | 10018 |
| **Protein residues** | 1278 |
| **N o Ligands** | - |
| **Water** | - |
| **B factor (Å2 )** | 233.60 |
| **R.m.s deviations** |  |
| **Bond lengths (Å2 )** | 0.003 |
| **Bond angles (o)** | 0.760 |
| **Validation** |  |
| **MoltProbity score** | 2.39 |
| **Clashscore** | 19.57 |
| **Poor rotamer (%)** | 0.16 |
| **Ramachandran plot** |  |
| **Favored (%)** | 87.8 |
| **Allowed (%)** | 12.0 |
| **Disallowed (%)** | 0.2 |

**Supplementary Table 3.** Relative intensity of identified lipid compounds in P116 and P116 after being incubated with either HDL, LDL, or H1299 lung cells.

| SUBCLASS | INDIVIDUAL NOTATION | P116 control | P116 control | P116 (tranfer from HDL) | P116 (tranfer from HDL) | P116 (tranfer from LDL) | P116 (tranfer from LDL) | P116 (tranfer from lung cell) | P116 (tranfer from lung cell) |
| --- | --- | --- | --- | --- | --- | --- | --- | --- | --- |
| Ceramides | Cer(d18:1/16:0) | 7 | 7 | 48 | 66 | 98 | 94 | 16 | 28 |
| Ceramides | Cer(d18:1/22:0) |  |  | 73 | 68 | 81 | 85 |  |  |
| Ceramides | Cer(d18:1/23:0) |  |  | 72 | 55 | 74 | 66 |  |  |
| Ceramides | Cer(d18:1/24:0) |  |  | 159 | 157 | 213 | 205 |  |  |
| Ceramides | Cer(d18:1/24:1)+Cer(d18:2/24:0) |  |  | 233 | 228 | 187 | 174 | 14 | 21 |
| Ceramides | Cer(42:3) |  |  | 76 | 125 | 60 | 34 |  |  |
| Cholesterol and derivatives | Cholesterol |  |  | 2780 | 2946 | 3350 | 3420 | 679 | 852 |
| Cholesteryl Ester | ChoE(16:0) |  |  | 244 | 221 | 142 | 122 |  |  |
| Cholesteryl Ester | ChoE(16:1) |  |  | 92 | 64 | 52 | 42 |  |  |
| Cholesteryl Ester | ChoE(18:1) | 19 | 17 | 1906 | 1558 | 1172 | 987 | 49 | 52 |
| Cholesteryl Ester | ChoE(18:2) | 82 | 102 | 12334 | 11213 | 7399 | 6830 | 89 | 97 |
| Cholesteryl Ester | ChoE(18:3) |  |  | 863 | 728 | 345 | 285 |  |  |
| Cholesteryl Ester | ChoE(20:2) | 6 | 11 | 78 | 65 | 34 | 32 | 5 | 7 |
| Cholesteryl Ester | ChoE(20:3) |  |  | 757 | 674 | 354 | 325 |  |  |
| Cholesteryl Ester | ChoE(20:4) | 21 | 25 | 10221 | 8800 | 3808 | 3367 | 44 | 46 |
| Cholesteryl Ester | ChoE(20:5) |  |  | 1246 | 1001 | 379 | 259 |  |  |
| Cholesteryl Ester | ChoE(22:4) |  |  | 73 | 59 | 26 | 22 |  |  |
| Cholesteryl Ester | ChoE(22:5) |  |  | 116 | 92 | 41 | 35 | 8 | 8 |
| Cholesteryl Ester | ChoE(22:6) |  |  | 2052 | 1844 | 725 | 851 | 18 | 26 |
| Cholesteryl Ester | ChoE(18:0) |  |  | 691 | 614 | 345 | 306 | 30 | 46 |
| Monohexosylceramides | CMH(d18:1/16:0) |  |  | 71 | 59 | 142 | 138 | 25 | 39 |
| Monohexosylceramides | CMH(d18:1/22:0) |  |  | 93 | 74 | 48 | 57 |  |  |
| Diacylglycerophosphocholine | PC(32:0) | 16 | 15 | 7531 | 7100 | 10722 | 10699 | 1031 | 1627 |
| Diacylglycerophosphocholine | PC(32:1) |  |  | 10562 | 10292 | 11778 | 11663 | 2588 | 4100 |
| Diacylglycerophosphocholine | PC(32:2) |  |  | 3652 | 3619 | 5925 | 5820 | 403 | 594 |
| Diacylglycerophosphocholine | PC(34:0) | 239 | 214 | 2832 | 2542 | 2503 | 2299 | 394 | 509 |
| Diacylglycerophosphocholine | PC(34:1) | 114 | 112 | 195331 | 189147 | 161075 | 159096 | 7734 | 12119 |
| Diacylglycerophosphocholine | PC(34:2) | 238 | 257 | 326185 | 314850 | 317528 | 303326 | 3006 | 4645 |
| Diacylglycerophosphocholine | PC(34:4) |  |  | 1102 | 1056 | 1582 | 1638 |  |  |
| Diacylglycerophosphocholine | PC(36:1) | 21 | 16 | 48982 | 44396 | 31605 | 29219 | 991 | 1474 |
| Diacylglycerophosphocholine | PC(36:2) | 129 | 115 | 246583 | 231695 | 183503 | 176803 | 4314 | 7262 |
| Diacylglycerophosphocholine | PC(36:4) | 7 | 8 | 24773 | 23090 | 23020 | 21806 | 11 | 35 |
| Diacylglycerophosphocholine | PC(36:4) | 69 | 78 | 191159 | 186175 | 151849 | 149858 | 363 | 536 |
| Diacylglycerophosphocholine | PC(36:5) |  |  | 16239 | 16544 | 18543 | 17929 | 25 | 51 |
| Diacylglycerophosphocholine | PC(36:6) |  |  | 426 | 398 | 681 | 626 |  |  |
| Diacylglycerophosphocholine | PC(38:2) |  |  | 5272 | 4545 | 3133 | 2900 | 450 | 812 |
| Diacylglycerophosphocholine | PC(38:3) | 13 | 14 | 46584 | 38010 | 28093 | 26383 | 97 | 125 |
| Diacylglycerophosphocholine | PC(38:4) | 52 | 54 | 92983 | 85837 | 60467 | 58171 | 249 | 326 |
| Diacylglycerophosphocholine | PC(38:5) |  |  | 35472 | 33310 | 24307 | 23451 | 516 | 744 |
| Diacylglycerophosphocholine | PC(38:5) |  |  | 13802 | 12073 | 10469 | 9987 |  |  |
| Diacylglycerophosphocholine | PC(38:6) |  |  | 9381 | 8980 | 9117 | 8576 | 48 | 68 |
| Diacylglycerophosphocholine | PC(38:6) | 28 | 18 | 138807 | 128788 | 132990 | 130911 | 187 | 272 |
| Diacylglycerophosphocholine | PC(40:4) |  |  | 2894 | 2737 | 1594 | 1532 | 18 | 30 |
| Diacylglycerophosphocholine | PC(40:4) |  |  | 435 | 422 | 238 | 235 | 8 | 7 |
| Diacylglycerophosphocholine | PC(40:5) |  |  | 3168 | 2935 | 1884 | 1810 |  |  |
| Diacylglycerophosphocholine | PC(40:5) |  |  | 4695 | 4290 | 3181 | 3028 | 111 | 151 |
| Diacylglycerophosphocholine | PC(40:6) | 10 | 11 | 33605 | 29695 | 23164 | 21569 | 87 | 142 |
| Diacylglycerophosphocholine | PC(40:7) |  |  | 346 | 321 | 273 | 242 | 4 | 6 |
| Diacylglycerophosphocholine | PC(40:7) |  |  | 7490 | 6842 | 6016 | 5763 | 132 | 214 |
| Diacylglycerophosphocholine | PC(40:8) |  |  | 1358 | 1337 | 1386 | 1368 |  |  |
| Diacylglycerophosphocholine | PC(42:8) |  |  | 254 | 236 | 174 | 166 |  |  |
| Diacylglycerophosphocholine | PC(34:3) |  |  | 4836 | 4593 | 5744 | 5643 | 49 | 80 |
| Diacylglycerophosphocholine | PC(34:3) |  |  | 1557 | 1526 | 1796 | 1710 | 17 | 25 |
| Diacylglycerophosphocholine | PC(34:3) |  |  | 2923 | 2657 | 3530 | 3658 |  |  |
| Diacylglycerophosphocholine | PC(36:3) | 22 | 21 | 49057 | 49507 | 34798 | 34278 | 383 | 578 |
| Diacylglycerophosphocholine | PC(36:3) | 20 | 17 | 69399 | 67251 | 51591 | 51744 | 130 | 173 |
| Diacylglycerophosphocholine | PC(36:5) |  |  | 1490 | 1264 | 1677 | 1530 | 63 | 75 |
| Diacylglycerophosphocholine | PC(31:0) |  |  | 339 | 327 | 631 | 558 | 38 | 71 |
| Diacylglycerophosphocholine | PC(28:0) |  |  | 103 | 112 | 343 | 340 | 114 | 150 |
| Diacylglycerophosphocholine | PC(30:0) |  |  | 1452 | 1305 | 2419 | 2463 | 575 | 858 |
| Diacylglycerophosphocholine | PC(30:1) |  |  | 195 | 187 | 402 | 364 | 287 | 474 |
| Diacylglycerophosphocholine | PC(36:0) |  |  | 6664 | 6057 | 4343 | 3971 | 130 | 180 |
| Diacylglycerophosphocholine | PC(40:0) | 77 | 68 | 115 | 120 | 104 | 23 | 98 | 77 |
| Diacylglycerophosphocholine | PC(40:1) | 10 | 11 | 97 | 74 | 49 | 38 | 21 | 27 |
| Oxidized Diacylglycerophosphocholine | PC(16:0/18:2-OH) |  |  | 2758 | 2617 | 1398 | 1090 |  |  |
| Oxidized Diacylglycerophosphocholine | PC(16:0/18:2-OH) |  |  | 2641 | 2316 | 1468 | 1071 |  |  |
| Oxidized Diacylglycerophosphocholine | PC(18:0/18:2-OH) |  |  | 1384 | 1261 | 487 | 393 |  |  |
| Oxidized Diacylglycerophosphocholine | PC(18:0/18:2-OH) |  |  | 1226 | 1139 | 498 | 397 |  |  |
| Oxidized Diacylglycerophosphocholine | PC(16:0/20:4-OH) |  |  | 874 | 839 | 363 | 348 |  |  |
| Oxidized Diacylglycerophosphocholine | PC(16:0/20:4-OH) |  |  | 2799 | 2504 | 1212 | 1071 |  |  |
| Oxidized Diacylglycerophosphocholine | PC(16:0/20:4-OH) |  |  | 2112 | 2035 | 1097 | 900 |  |  |
| Oxidized Diacylglycerophosphocholine | PC(36:4-OH) |  |  | 794 | 691 | 363 | 288 |  |  |
| Oxidized Diacylglycerophosphocholine | PC(18:0/20:4-OH) |  |  | 485 | 440 | 138 | 124 |  |  |
| Oxidized Diacylglycerophosphocholine | PC(18:0/20:4-OH) |  |  | 1673 | 1373 | 549 | 428 |  |  |
| Diacylglycerophosphoethanolamine | PE(34:1) | 81 | 76 | 8734 | 5159 | 13182 | 4848 | 60 | 117 |
| Diacylglycerophosphocholine | PC(33:0) |  |  | 376 | 301 | 399 | 355 | 17 | 29 |
| Diacylglycerophosphocholine | PC(33:1) |  |  | 3368 | 3032 | 3024 | 2931 | 177 | 285 |
| Diacylglycerophosphocholine | PC(33:2) |  |  | 4387 | 4366 | 5591 | 5583 | 55 | 80 |
| Diacylglycerophosphoethanolamine | PE(36:3) |  |  | 411 | 356 | 303 | 233 | 10 | 19 |
| Diacylglycerophosphoethanolamine | PE(36:4) |  |  | 771 | 701 | 598 | 535 | 14 | 25 |
| Diacylglycerophosphoethanolamine | PE(36:4) |  |  | 146 | 102 | 123 | 140 |  |  |
| Diacylglycerophosphoethanolamine | PE(36:5) | 12 | 14 | 67 | 61 | 83 | 73 | 16 | 19 |
| Diacylglycerophosphocholine | PC(35:1) |  |  | 1401 | 1381 | 894 | 798 | 41 | 48 |
| Diacylglycerophosphocholine | PC(35:1) |  |  | 4046 | 3382 | 2625 | 2427 | 144 | 210 |
| Diacylglycerophosphocholine | PC(35:2) |  |  | 2797 | 2757 | 2080 | 2087 | 131 | 211 |
| Diacylglycerophosphocholine | PC(35:2) |  |  | 6989 | 6176 | 4925 | 4855 |  |  |
| Diacylglycerophosphocholine | PC(35:3) |  |  | 551 | 529 | 470 | 490 |  |  |
| Diacylglycerophosphocholine | PC(35:3) |  |  | 472 | 427 | 372 | 354 |  |  |
| Diacylglycerophosphocholine | PC(35:4) |  |  | 1460 | 1329 | 1653 | 1627 | 7 | 5 |
| Diacylglycerophosphoethanolamine | PE(38:4) |  |  | 1661 | 1465 | 910 | 801 | 10 | 27 |
| Diacylglycerophosphoethanolamine | PE(38:5) |  |  | 449 | 451 | 292 | 265 | 31 | 89 |
| Diacylglycerophosphoethanolamine | PE(38:6) |  |  | 1190 | 953 | 892 | 819 |  |  |
| Diacylglycerophosphocholine | PC(37:2) |  |  | 208 | 152 | 96 | 99 | 45 | 75 |
| Diacylglycerophosphocholine | PC(37:2) |  |  | 872 | 782 | 496 | 481 |  |  |
| Diacylglycerophosphocholine | PC(37:3) |  |  | 644 | 623 | 410 | 380 | 9 | 7 |
| Diacylglycerophosphocholine | PC(37:3) |  |  | 835 | 784 | 568 | 514 |  |  |
| Diacylglycerophosphocholine | PC(37:4) |  |  | 1353 | 1322 | 910 | 891 |  |  |
| Diacylglycerophosphocholine | PC(37:4) |  |  | 4140 | 4025 | 2936 | 3085 | 25 | 23 |
| Diacylglycerophosphocholine | PC(37:5) |  |  | 678 | 622 | 656 | 617 |  |  |
| Diacylglycerophosphoethanolamine | PE(40:6) |  |  | 556 | 445 | 342 | 295 |  |  |
| Diacylglycerophosphocholine | PC(37:6) |  |  | 644 | 604 | 728 | 725 |  |  |
| Diacylglycerophosphoethanolamine | PE(16:0/16:0) | 14 | 13 | 292 | 184 | 522 | 201 | 8 | 10 |
| Diacylglycerophosphoethanolamine | PE(32:1) | 113 | 98 | 10794 | 6215 | 14245 | 5364 | 31 | 56 |
| Diacylglycerophosphoethanolamine | PE(36:1) |  |  | 386 | 279 | 349 | 156 | 31 | 63 |
| Diacylglycerophosphoinositol | PI(38:4) |  |  | 120 | 173 | 138 | 177 |  |  |
| Diacylglycerophosphoinositol | PI(36:4) |  |  | 54 | 57 | 38 | 51 |  |  |
| Diacylglycerophosphoinositol | PI(40:6) |  |  | 18 | 28 | 28 | 32 |  |  |
| Diacylglycerols | DG(32:0) | 108 | 84 | 180 | 225 | 280 | 91 | 65 | 69 |
| Diacylglycerols | DG(32:1) | 32 | 36 | 235 | 230 | 209 | 125 | 45 | 38 |
| Diacylglycerols | DG(34:0) | 280 | 152 | 244 | 238 | 825 | 140 | 94 | 109 |
| Diacylglycerols | DG(34:1) | 50 | 53 | 1096 | 984 | 505 | 416 | 99 | 79 |
| Diacylglycerols | DG(34:2) |  |  | 547 | 511 | 334 | 240 |  |  |
| Diacylglycerols | DG(36:2) | 36 | 17 | 1141 | 1126 | 552 | 475 | 60 | 70 |
| Diacylglycerols | DG(36:3) |  |  | 636 | 601 | 343 | 338 |  |  |
| Diacylglycerols | DG(36:4) |  |  | 48 | 54 | 31 | 36 |  |  |
| Diacylglycerols | DG(30:0) | 18 | 19 | 59 | 65 | 60 | 35 | 21 | 18 |
| Diacylglycerols | DG(36:1) |  |  | 114 | 151 | 48 | 30 | 18 | 18 |
| Diacylglycerols | DG(38:5) |  |  | 84 | 98 | 55 | 58 |  |  |
| 1-ether, 2-acylglycerophosphocholine | PC(O-16:0/14:0) |  |  | 122 | 108 | 262 | 265 | 31 | 67 |
| 1-ether, 2-acylglycerophosphocholine | PC(O-16:0/16:0) |  |  | 2300 | 2000 | 2927 | 2717 | 209 | 302 |
| 1-ether, 2-acylglycerophosphocholine | PC(P-16:0/16:0) |  |  | 1935 | 1619 | 1879 | 1808 | 54 | 85 |
| 1-ether, 2-acylglycerophosphocholine | PC(O-34:0) |  |  | 336 | 275 | 289 | 272 | 29 | 53 |
| 1-ether, 2-acylglycerophosphocholine | PC(O-34:1) |  |  | 9446 | 8327 | 7179 | 6848 | 573 | 916 |
| 1-ether, 2-acylglycerophosphocholine | PC(O-16:0/18:2) | 6 | 4 | 7055 | 5831 | 5706 | 5437 | 6 | 13 |
| 1-ether, 2-acylglycerophosphocholine | PC(P-16:0/18:1) |  |  | 5352 | 4872 | 3398 | 3252 | 82 | 152 |
| 1-ether, 2-acylglycerophosphocholine | PC(P-16:0/18:2) |  |  | 10220 | 9193 | 7643 | 7075 |  |  |
| 1-ether, 2-acylglycerophosphocholine | PC(O-18:1/18:1) |  |  | 1770 | 1418 | 981 | 937 | 101 | 164 |
| 1-ether, 2-acylglycerophosphocholine | PC(O-18:0/18:2) |  |  | 1179 | 914 | 741 | 697 | 1 | 1 |
| 1-ether, 2-acylglycerophosphocholine | PC(O-18:1/18:2) |  |  | 3922 | 3403 | 2502 | 2357 | 7 | 16 |
| 1-ether, 2-acylglycerophosphocholine | PC(O-16:0/20:3) |  |  | 894 | 928 | 744 | 754 |  |  |
| 1-ether, 2-acylglycerophosphocholine | PC(P-36:2) |  |  | 3174 | 2777 | 1775 | 1680 | 36 | 50 |
| 1-ether, 2-acylglycerophosphocholine | PC(O-16:0/20:4) | 7 | 9 | 18918 | 17054 | 14867 | 13954 | 81 | 123 |
| 1-ether, 2-acylglycerophosphocholine | PC(P-16:0/20:3) |  |  | 1152 | 1090 | 755 | 724 |  |  |
| 1-ether, 2-acylglycerophosphocholine | PC(P-16:0/20:4) |  |  | 14037 | 12869 | 9830 | 9862 | 52 | 82 |
| 1-ether, 2-acylglycerophosphocholine | PC(O-38:4) |  |  | 968 | 896 | 634 | 590 | 17 | 32 |
| 1-ether, 2-acylglycerophosphocholine | PC(O-16:0/22:4) |  |  | 1978 | 1888 | 1349 | 1246 | 12 | 13 |
| 1-ether, 2-acylglycerophosphocholine | PC(O-18:0/20:4) |  |  | 7591 | 6797 | 4696 | 4295 | 22 | 24 |
| 1-ether, 2-acylglycerophosphocholine | PC(18:1e/20:3) |  |  | 246 | 195 | 120 | 121 |  |  |
| 1-ether, 2-acylglycerophosphocholine | PC(O-38:5) |  |  | 21858 | 19863 | 14606 | 13753 | 174 | 269 |
| 1-ether, 2-acylglycerophosphocholine | PC(P-18:0/20:4) | 12 | 9 | 669 | 649 | 429 | 390 | 35 | 73 |
| 1-ether, 2-acylglycerophosphocholine | PC(P-18:0/20:4) |  |  | 3054 | 2576 | 1902 | 1670 | 7 | 15 |
| 1-ether, 2-acylglycerophosphocholine | PC(O-18:2/20:4) |  |  | 1389 | 1408 | 1265 | 1247 | 17 | 38 |
| 1-ether, 2-acylglycerophosphocholine | PC(P-16:0/22:6) |  |  | 2057 | 1865 | 1613 | 1423 | 22 | 28 |
| 1-ether, 2-acylglycerophosphocholine | PC(O-18:0/22:4) |  |  | 448 | 363 | 263 | 219 |  |  |
| 1-ether, 2-acylglycerophosphocholine | PC(O-20:0/20:4) |  |  | 1079 | 949 | 555 | 504 | 10 | 6 |
| 1-ether, 2-acylglycerophosphocholine | PC(O-18:1/22:4) |  |  | 1116 | 918 | 651 | 595 |  |  |
| 1-ether, 2-acylglycerophosphocholine | PC(O-40:5) |  |  | 2147 | 1840 | 1236 | 1087 |  |  |
| 1-ether, 2-acylglycerophosphocholine | PC(O-22:1/20:4) |  |  | 1973 | 1758 | 1007 | 992 | 4 | 12 |
| 1-ether, 2-acylglycerophosphocholine | PC(O-42:6) |  |  | 681 | 576 | 373 | 345 |  |  |
| 1-ether, 2-acylglycerophosphocholine | PC(O-22:0/20:4) | 3 | 2 | 674 | 620 | 316 | 314 | 3 | 9 |
| 1-ether, 2-acylglycerophosphocholine | PC(O-24:1/20:4) |  |  | 2595 | 2325 | 1334 | 1244 | 9 | 16 |
| 1-ether, 2-acylglycerophosphoethanolamine | PE(O-16:0/18:1) |  |  | 158 | 143 | 81 | 97 | 26 | 67 |
| 1-ether, 2-acylglycerophosphoethanolamine | PE(P-16:0/18:2) |  |  | 346 | 310 | 222 | 220 |  |  |
| 1-ether, 2-acylglycerophosphoethanolamine | PE(P-18:0/18:1) |  |  | 144 | 124 | 61 | 53 | 8 | 19 |
| 1-ether, 2-acylglycerophosphoethanolamine | PE(P-16:0/20:4) |  |  | 1429 | 1223 | 839 | 768 | 49 | 87 |
| 1-ether, 2-acylglycerophosphoethanolamine | PE(P-18:0/20:4) |  |  | 1669 | 1418 | 817 | 690 | 6 | 19 |
| 1-ether, 2-acylglycerophosphoethanolamine | PE(P-18:1/20:4) |  |  | 1186 | 1027 | 583 | 546 | 38 | 97 |
| 1-ether, 2-acylglycerophosphoethanolamine | PE(P-18:1/20:4) |  |  | 117 | 107 | 75 | 65 |  |  |
| 1-ether, 2-acylglycerophosphoethanolamine | PE(P-16:0/22:6) |  |  | 923 | 763 | 628 | 528 | 23 | 45 |
| 1-ether, 2-acylglycerophosphocholine | PC(P-17:0/20:4) |  |  | 349 | 306 | 215 | 204 |  |  |
| 1-ether, 2-acylglycerophosphocholine | PC(P-17:0/20:4) |  |  | 625 | 557 | 392 | 368 |  |  |
| 1-ether, 2-acylglycerophosphoethanolamine | PE(P-18:0/18:2) |  |  | 445 | 378 | 253 | 221 |  |  |
| 1-ether, 2-acylglycerophosphoethanolamine | PE(16:1e/20:5) |  |  | 138 | 129 | 69 | 72 |  |  |
| 1-ether, 2-acylglycerophosphoethanolamine | PE(18:1e/22:6) |  |  | 739 | 618 | 356 | 376 |  |  |
| 1-ether, 2-acylglycerophosphoethanolamine | PE(18:2e/22:6) |  |  | 558 | 492 | 335 | 310 | 14 | 36 |
| Monoacylglycerols | MG(16:0/0:0/0:0) | 1033 | 367 | 753 | 399 | 1702 | 308 | 149 | 142 |
| Monoacylglycerols | MG(18:0/0:0/0:0) | 1190 | 443 | 759 | 411 | 2269 | 349 | 61 | 63 |
| Monoacylglycerols | MG(18:1(9Z)/0:0/0:0) |  |  | 58 | 69 | 86 | 58 |  |  |
| Sphingomyelin | SM(d18:0/14:0) |  |  | 115 | 124 | 745 | 723 | 17 | 28 |
| Sphingomyelin | SM(d18:0/15:0) |  |  | 28 | 37 | 93 | 95 |  |  |
| Sphingomyelin | SM(d18:0/16:0) |  |  | 1819 | 1627 | 5188 | 4918 | 142 | 219 |
| Sphingomyelin | SM(d18:0/18:0) |  |  | 341 | 302 | 612 | 591 | 8 | 6 |
| Sphingomyelin | SM(d18:0/22:0) |  |  | 226 | 189 | 233 | 208 |  |  |
| Sphingomyelin | SM(d18:1/12:0) |  |  | 209 | 192 | 744 | 722 | 36 | 56 |
| Sphingomyelin | SM(32:1) |  |  | 5704 | 5437 | 33924 | 33493 | 298 | 439 |
| Sphingomyelin | SM(33:1) |  |  | 3003 | 2975 | 14967 | 14394 | 81 | 124 |
| Sphingomyelin | SM(d18:1/16:0) | 47 | 53 | 61021 | 57812 | 168304 | 166541 | 1233 | 1890 |
| Sphingomyelin | SM(d18:2/16:0) |  |  | 14342 | 13695 | 51941 | 52449 | 282 | 437 |
| Sphingomyelin | SM(d18:1/17:0) |  |  | 1229 | 1054 | 2356 | 2221 | 16 | 22 |
| Sphingomyelin | SM(d18:1/18:0) |  |  | 7164 | 6666 | 11127 | 11402 | 70 | 96 |
| Sphingomyelin | SM(36:2) |  |  | 7527 | 6914 | 12087 | 11516 | 19 | 29 |
| Sphingomyelin | SM(38:1) |  |  | 7124 | 6182 | 6918 | 6514 | 22 | 17 |
| Sphingomyelin | SM(d18:2/20:0) |  |  | 3720 | 3314 | 3784 | 3531 |  |  |
| Sphingomyelin | SM(39:1) |  |  | 2955 | 2544 | 2207 | 2129 |  |  |
| Sphingomyelin | SM(d18:1/22:0) |  |  | 13293 | 11865 | 10884 | 10564 | 53 | 72 |
| Sphingomyelin | SM(d16:1/24:1) |  |  | 3946 | 3699 | 3588 | 3015 | 30 | 38 |
| Sphingomyelin | SM(d18:2/22:0) |  |  | 11330 | 9289 | 7672 | 7675 | 17 | 25 |
| Sphingomyelin | SM(d18:1/23:0) |  |  | 7894 | 7178 | 6369 | 6072 | 23 | 37 |
| Sphingomyelin | SM(d18:1/23:1) |  |  | 2859 | 2560 | 2199 | 2067 | 21 | 37 |
| Sphingomyelin | SM(d18:2/23:0) |  |  | 4380 | 3660 | 2786 | 2636 |  |  |
| Sphingomyelin | SM(d18:1/24:1) + SM(d18:2/24:0) |  |  | 39440 | 33461 | 29254 | 27326 | 276 | 418 |
| Sphingomyelin | SM(42:3) |  |  | 21358 | 19346 | 15114 | 14478 | 65 | 98 |
| Sphingomyelin | SM(d18:2/14:0) |  |  | 643 | 551 | 1780 | 1647 | 91 | 111 |
| Sphingomyelin | SM(42:1) |  |  | 8399 | 7150 | 6174 | 5954 | 52 | 76 |
| Sphingomyelin | SM(d18:1/25:0) |  |  | 211 | 164 | 132 | 121 |  |  |
| Sphingomyelin | SM(43:1) |  |  | 241 | 201 | 138 | 152 |  |  |
| Sphingomyelin | SM(43:2) |  |  | 800 | 652 | 554 | 502 |  |  |
| Sphingomyelin | SM(38:0) |  |  | 158 | 123 | 162 | 163 |  |  |
| Sphingomyelin | SM(31:1) |  |  | 96 | 95 | 499 | 460 | 22 | 29 |
| Triacylglycerols | TG(51:0) | 206 | 201 | 475 | 435 | 314 | 203 | 211 | 176 |
| Triacylglycerols | TG(42:0) | 45 | 49 | 96 | 79 | 73 | 72 | 46 | 29 |
| Triacylglycerols | TG(44:0) | 319 | 317 | 708 | 652 | 490 | 388 | 348 | 304 |
| Triacylglycerols | TG(44:1) | 159 | 130 | 340 | 343 | 244 | 179 | 166 | 127 |
| Triacylglycerols | TG(44:2) | 32 | 29 | 81 | 78 | 44 | 45 | 37 | 22 |
| Triacylglycerols | TG(45:0) | 398 | 355 | 1100 | 979 | 741 | 501 | 404 | 324 |
| Triacylglycerols | TG(46:0) | 670 | 668 | 1697 | 1691 | 1393 | 1013 | 786 | 610 |
| Triacylglycerols | TG(46:1) | 613 | 508 | 1717 | 1653 | 1088 | 766 | 630 | 473 |
| Triacylglycerols | TG(46:2) | 234 | 211 | 585 | 647 | 372 | 240 | 238 | 196 |
| Triacylglycerols | TG(46:3) | 42 | 38 | 94 | 116 | 74 | 52 | 59 | 38 |
| Triacylglycerols | TG(47:0) | 714 | 683 | 1634 | 1484 | 1213 | 744 | 757 | 610 |
| Triacylglycerols | TG(43:0) | 93 | 71 | 242 | 194 | 159 | 76 | 103 | 82 |
| Triacylglycerols | TG(43:1) | 77 | 57 | 122 | 130 | 86 | 51 | 71 | 43 |
| Triacylglycerols | TG(45:2) | 123 | 110 | 208 | 220 | 168 | 94 | 124 | 103 |
| Triacylglycerols | TG(46:3) | 57 | 50 | 112 | 137 | 72 | 51 | 52 | 38 |
| Triacylglycerols | TG(47:1) | 679 | 635 | 1854 | 1924 | 1314 | 843 | 780 | 576 |
| Triacylglycerols | TG(48:0) | 1115 | 1142 | 2467 | 2514 | 2175 | 1618 | 1318 | 1103 |
| Triacylglycerols | TG(52:4) |  |  | 59 | 47 | 32 | 24 |  |  |
| Triacylglycerols | TG(55:0) | 243 | 260 | 492 | 446 | 407 | 229 | 277 | 205 |
| Triacylglycerols | TG(55:1) | 159 | 156 | 352 | 331 | 255 | 160 | 179 | 119 |
| Triacylglycerols | TG(55:2) | 99 | 66 | 203 | 182 | 136 | 80 | 105 | 75 |
| Triacylglycerols | TG(55:3) | 41 | 29 | 132 | 109 | 105 | 68 | 59 | 52 |
| Triacylglycerols | TG(48:2) | 589 | 517 | 2991 | 2973 | 1582 | 1057 | 640 | 535 |
| Triacylglycerols | TG(48:3) | 223 | 166 | 686 | 713 | 356 | 253 | 191 | 162 |
| Triacylglycerols | TG(49:0) | 502 | 513 | 1226 | 1129 | 886 | 574 | 573 | 443 |
| Triacylglycerols | TG(49:1) | 771 | 678 | 2153 | 2031 | 1388 | 886 | 818 | 609 |
| Triacylglycerols | TG(49:2) | 566 | 499 | 1738 | 1846 | 1189 | 787 | 611 | 475 |
| Triacylglycerols | TG(49:3) | 223 | 185 | 508 | 605 | 369 | 233 | 229 | 188 |
| Triacylglycerols | TG(50:0) | 579 | 654 | 1252 | 1566 | 1047 | 800 | 635 | 586 |
| Triacylglycerols | TG(50:1) | 889 | 737 | 9688 | 9348 | 5319 | 4314 | 1191 | 1190 |
| Triacylglycerols | TG(50:2) | 816 | 712 | 12801 | 12242 | 6051 | 5174 | 1131 | 1151 |
| Triacylglycerols | TG(50:3) | 342 | 280 | 5676 | 5304 | 2073 | 1669 | 429 | 337 |
| Triacylglycerols | TG(50:4) |  |  | 662 | 597 | 177 | 142 |  |  |
| Triacylglycerols | TG(51:1) | 351 | 317 | 1170 | 986 | 762 | 479 | 382 | 312 |
| Triacylglycerols | TG(51:2) | 437 | 405 | 2322 | 2128 | 1206 | 870 | 476 | 391 |
| Triacylglycerols | TG(51:3) | 192 | 186 | 1279 | 1278 | 624 | 463 | 231 | 168 |
| Triacylglycerols | TG(51:4) | 40 | 50 | 293 | 289 | 147 | 109 | 43 | 34 |
| Triacylglycerols | TG(52:0) | 416 | 412 | 665 | 911 | 540 | 463 | 382 | 358 |
| Triacylglycerols | TG(52:1) | 382 | 345 | 2998 | 2842 | 1752 | 1457 | 523 | 527 |
| Triacylglycerols | TG(52:2) | 1308 | 1012 | 52915 | 51170 | 23027 | 21374 | 2105 | 2565 |
| Triacylglycerols | TG(52:3) | 676 | 620 | 48290 | 43724 | 19835 | 17853 | 918 | 1031 |
| Triacylglycerols | TG(52:4) | 121 | 135 | 15188 | 13132 | 5093 | 4218 | 143 | 125 |
| Triacylglycerols | TG(52:5) |  |  | 1975 | 1755 | 663 | 571 |  |  |
| Triacylglycerols | TG(53:0) | 164 | 153 | 331 | 291 | 235 | 164 | 173 | 112 |
| Triacylglycerols | TG(53:1) | 137 | 92 | 357 | 331 | 252 | 168 | 147 | 109 |
| Triacylglycerols | TG(53:2) | 152 | 156 | 1282 | 959 | 682 | 521 | 200 | 172 |
| Triacylglycerols | TG(53:3) | 130 | 115 | 1313 | 1202 | 607 | 499 | 159 | 131 |
| Triacylglycerols | TG(54:0) | 269 | 293 | 513 | 572 | 467 | 281 | 294 | 242 |
| Triacylglycerols | TG(54:1) | 283 | 240 | 857 | 724 | 572 | 427 | 339 | 284 |
| Triacylglycerols | TG(54:2) | 435 | 307 | 5159 | 4891 | 2796 | 2336 | 656 | 773 |
| Triacylglycerols | TG(54:3) | 1218 | 637 | 20957 | 21709 | 10137 | 9340 | 1508 | 1650 |
| Triacylglycerols | TG(54:4) | 366 | 258 | 15146 | 14341 | 7108 | 6523 | 355 | 316 |
| Triacylglycerols | TG(54:5) | 169 | 137 | 6704 | 6316 | 2430 | 2077 | 176 | 100 |
| Triacylglycerols | TG(54:5) |  |  | 1625 | 1372 | 689 | 574 | 8 | 11 |
| Triacylglycerols | TG(54:6) | 80 | 72 | 1329 | 1198 | 422 | 329 | 95 | 69 |
| Triacylglycerols | TG(54:6) |  |  | 920 | 746 | 318 | 291 |  |  |
| Triacylglycerols | TG(54:7) | 21 | 23 | 120 | 112 | 40 | 30 | 25 | 20 |
| Triacylglycerols | TG(54:7) |  |  | 88 | 68 | 30 | 33 |  |  |
| Triacylglycerols | TG(56:0) | 296 | 277 | 569 | 517 | 431 | 253 | 327 | 230 |
| Triacylglycerols | TG(56:1) | 270 | 219 | 562 | 538 | 422 | 234 | 283 | 244 |
| Triacylglycerols | TG(56:2) | 177 | 129 | 391 | 451 | 330 | 214 | 213 | 216 |
| Triacylglycerols | TG(56:3) | 59 | 31 | 496 | 514 | 350 | 268 | 215 | 297 |
| Triacylglycerols | TG(56:5) |  |  | 1139 | 963 | 535 | 464 |  |  |
| Triacylglycerols | TG(56:6) |  |  | 2998 | 2513 | 1408 | 1262 |  |  |
| Triacylglycerols | TG(56:7) |  |  | 849 | 720 | 367 | 356 |  |  |
| Triacylglycerols | TG(56:7) |  |  | 963 | 828 | 443 | 403 | 20 | 16 |
| Triacylglycerols | TG(56:8) |  |  | 143 | 109 | 46 | 41 |  |  |
| Triacylglycerols | TG(56:8) |  |  | 439 | 368 | 185 | 157 |  |  |
| Triacylglycerols | TG(58:1) | 226 | 210 | 439 | 445 | 374 | 216 | 275 | 210 |
| Triacylglycerols | TG(58:2) | 195 | 146 | 331 | 409 | 259 | 175 | 240 | 219 |
| Triacylglycerols | TG(58:3) | 26 | 25 | 73 | 107 | 79 | 40 | 74 | 98 |
| Triacylglycerols | TG(58:8) |  |  | 443 | 375 | 282 | 281 | 9 | 15 |
| Triacylglycerols | TG(58:9) |  |  | 289 | 245 | 158 | 131 |  |  |
| Triacylglycerols | TG(58:10) |  |  | 92 | 83 | 46 | 38 |  |  |
| Triacylglycerols | TG(59:1) | 165 | 157 | 289 | 288 | 227 | 124 | 181 | 127 |
| Triacylglycerols | TG(60:1) | 102 | 84 | 202 | 194 | 138 | 93 | 117 | 95 |
| Triacylglycerols | TG(60:2) | 131 | 82 | 227 | 267 | 199 | 114 | 185 | 170 |
| Triacylglycerols | TG(42:1) | 27 | 22 | 54 | 47 | 30 | 34 | 18 | 18 |
| Triacylglycerols | TG(53:4) |  |  | 436 | 379 | 148 | 112 |  |  |
| Triacylglycerols | TG(45:1) | 383 | 333 | 733 | 786 | 537 | 348 | 413 | 342 |
| Acylcarnitines | AC(18:1n-9) |  |  | 1 | 1 | 2 | 2 | 1 | 2 |
| Saturated fatty acids | 16:0 | 67 | 53 | 91 | 120 | 164 | 161 | 142 | 130 |
| Monounsaturated fatty acids |  | 1 | 1 | 1 | 2 | 2 | 1 | 1 | 1 |
| Saturated fatty acids | 18:0 | 72 | 58 | 82 | 100 | 126 | 119 | 114 | 109 |
| Monounsaturated fatty acids | 18:1n-9 | 13 | 12 | 40 | 40 | 44 | 40 | 40 | 52 |
| Polyunsaturated fatty acids | 18:2n-6 | 3 | 2 | 7 | 7 | 17 | 11 | 4 | 4 |
| Monounsaturated fatty acids | 20:1n-6 |  |  |  | 2 | 1 | 1 | 3 | 4 |
| Polyunsaturated fatty acids | 20:3n-3 |  |  | 2 | 1 | 3 | 3 | 1 | 2 |
| Polyunsaturated fatty acids | 20:4n-6 |  | 1 | 14 | 7 | 29 | 29 | 11 | 17 |
| Polyunsaturated fatty acids | 20:5n-3 |  |  |  |  | 2 | 2 | 1 | 2 |
| Polyunsaturated fatty acids | 22:4n-6 |  |  | 1 | 1 | 1 | 1 | 2 | 3 |
| Polyunsaturated fatty acids | 22:5n-3 |  |  | 1 | 1 | 1 | 2 | 3 | 5 |
| Polyunsaturated fatty acids | 22:6n-3 |  |  | 6 | 4 | 15 | 14 | 11 | 16 |
| Saturated fatty acids | 20:0 | 2 | 1 | 2 | 3 | 2 | 3 | 3 | 2 |
| Hydroxy-octadecadienoic acids | 9-HODE + 13-HODE |  |  | 3 | 2 | 7 | 6 |  |  |
| 1-Monoacylglycerophosphocholine | PC(14:0/0:0) | 3 | 3 | 4 | 4 | 7 | 6 | 6 | 6 |
| 2-Monoacylglycerophosphocholine | PC(0:0/14:0) | 0 | 0 | 1 | 1 | 1 | 1 | 1 | 1 |
| 1-Monoacylglycerophosphocholine | PC(15:0/0:0) | 2 | 3 | 5 | 9 | 15 | 13 | 4 | 5 |
| 2-Monoacylglycerophosphocholine | PC(0:0/15:0) |  |  | 0 | 1 | 1 | 1 | 1 | 1 |
| 1-Monoacylglycerophosphocholine | PC(16:0/0:0) | 12 | 20 | 1049 | 1541 | 2396 | 2266 | 241 | 259 |
| 2-Monoacylglycerophosphocholine | PC(0:0/16:0) | 2 | 5 | 107 | 221 | 343 | 336 | 28 | 32 |
| 2-Monoacylglycerophosphocholine | PC(0:0/16:1) |  |  | 1 | 1 | 1 | 1 | 3 | 3 |
| 1-Monoacylglycerophosphocholine | PC(16:1/0:0) |  |  | 1 | 3 | 3 | 2 | 16 | 16 |
| 2-Monoacylglycerophosphocholine | PC(0:0/18:0) | 1 | 2 | 153 | 168 | 337 | 320 | 39 | 56 |
| 1-Monoacylglycerophosphocholine | PC(18:0/0:0) | 8 | 13 | 1296 | 1338 | 2342 | 2246 | 397 | 494 |
| 2-Monoacylglycerophosphocholine | PC(0:0/18:1) |  | 1 | 53 | 67 | 71 | 65 | 26 | 34 |
| 1-Monoacylglycerophosphocholine | PC(18:1/0:0) | 2 | 4 | 400 | 571 | 656 | 614 | 220 | 274 |
| 1-Monoacylglycerophosphocholine | PC(18:1/0:0) |  |  | 16 | 18 | 34 | 32 |  |  |
| 2-Monoacylglycerophosphocholine | PC(0:0/18:2) | 1 | 2 | 44 | 52 | 48 | 45 | 2 | 2 |
| 1-Monoacylglycerophosphocholine | PC(18:2/0:0) | 3 | 5 | 51 | 158 | 172 | 159 | 8 | 8 |
| 1-Monoacylglycerophosphocholine | PC(18:2/0:0) |  |  | 1 | 1 | 1 | 1 | 2 | 2 |
| 1-Monoacylglycerophosphocholine | PC(20:0/0:0) |  |  | 11 | 10 | 27 | 25 | 12 | 16 |
| 2-Monoacylglycerophosphocholine | PC(0:0/20:1) |  |  | 2 | 2 | 3 | 2 | 4 | 5 |
| 1-Monoacylglycerophosphocholine | PC(20:1/0:0) |  |  | 24 | 22 | 34 | 31 | 29 | 41 |
| 2-Monoacylglycerophosphocholine | PC(0:0/20:2) |  |  | 2 | 2 | 3 | 3 | 0 | 0 |
| 1-Monoacylglycerophosphocholine | PC(20:2/0:0) |  |  | 11 | 11 | 18 | 17 | 2 | 3 |
| 2-Monoacylglycerophosphocholine | PC(0:0/20:3) | 0 | 0 | 8 | 8 | 8 | 7 |  |  |
| 1-Monoacylglycerophosphocholine | PC(20:3/0:0) |  |  | 18 | 28 | 33 | 31 | 5 | 6 |
| 2-Monoacylglycerophosphocholine | PC(0:0/20:4) | 9 | 16 | 32 | 33 | 27 | 23 | 3 | 3 |
| 1-Monoacylglycerophosphocholine | PC(20:4/0:0) | 2 | 3 | 40 | 64 | 53 | 50 | 10 | 10 |
| 2-Monoacylglycerophosphocholine | PC(0:0/22:4) |  |  | 2 | 1 | 2 | 1 |  |  |
| 1-Monoacylglycerophosphocholine | PC(22:4/0:0) |  |  | 4 | 4 | 5 | 5 | 4 | 5 |
| 2-Monoacylglycerophosphocholine | PC(0:0/22:5) |  |  | 2 | 2 | 2 | 2 | 1 | 1 |
| 1-Monoacylglycerophosphocholine | PC(22:5/0:0) |  |  | 4 | 4 | 7 | 6 | 7 | 8 |
| 1-Monoacylglycerophosphocholine | PC(22:5/0:0) |  |  | 2 | 2 | 3 | 3 | 1 | 1 |
| 2-Monoacylglycerophosphocholine | PC(0:0/22:6) |  |  | 9 | 8 | 9 | 8 |  |  |
| 1-Monoacylglycerophosphocholine | PC(22:6/0:0) |  |  | 21 | 26 | 28 | 26 | 8 | 8 |
| 1-Monoacylglycerophosphocholine | PC(17:0/0:0) |  |  | 30 | 36 | 68 | 65 | 12 | 12 |
| 2-Monoacylglycerophosphocholine | PC(0:0/17:0) |  |  | 6 | 7 | 14 | 13 |  |  |
| 1-Monoacylglycerophosphocholine | PC(19:0/0:0) |  |  | 7 | 7 | 16 | 15 | 10 | 12 |
| Monoacylglycerophosphocholine | LPC(22:0) |  |  | 3 | 3 | 8 | 8 | 2 | 3 |
| Monoacylglycerophosphocholine | LPC(22:1) |  |  | 2 | 2 | 4 | 4 | 3 | 5 |
| 1-Monoacylglycerophosphoethanolamine | PE(14:0/0:0) |  |  | 2 | 1 | 2 | 1 |  |  |
| 2-Monoacylglycerophosphoethanolamine | PE(0:0/16:0) |  |  | 4 | 4 | 8 | 6 | 1 | 2 |
| 1-Monoacylglycerophosphoethanolamine | PE(16:0/0:0) | 6 | 6 | 32 | 32 | 71 | 51 | 4 | 6 |
| 2-Monoacylglycerophosphoethanolamine |  | 1 | 1 | 4 | 2 | 5 | 3 |  |  |
| 2-Monoacylglycerophosphoethanolamine | PE(0:0/18:0) |  |  | 6 | 6 | 12 | 13 | 1 | 3 |
| 1-Monoacylglycerophosphoethanolamine | PE(18:0/0:0) |  |  | 52 | 51 | 119 | 110 | 12 | 19 |
| 1-Monoacylglycerophosphoethanolamine | PE(18:1/0:0) | 5 | 5 | 53 | 47 | 71 | 47 | 18 | 35 |
| 2-Monoacylglycerophosphoethanolamine | PE(0:0/18:2) |  |  | 5 | 5 | 4 | 4 |  |  |
| 1-Monoacylglycerophosphoethanolamine | PE(18:2/0:0) |  |  | 4 | 10 | 7 | 7 |  |  |
| 2-Monoacylglycerophosphoethanolamine | PE(0:0/20:4) | 1 | 1 | 17 | 15 | 12 | 10 | 5 | 9 |
| 1-Monoacylglycerophosphoethanolamine | PE(20:4/0:0) |  |  | 9 | 14 | 6 | 7 | 4 | 7 |
| 1-Monoacylglycerophosphoethanolamine | PE(22:4/0:0) |  |  | 1 | 1 | 1 | 1 | 2 | 3 |
| Monoacylglycerophosphoethanolamine |  |  |  | 1 | 1 | 1 | 1 | 1 | 2 |
| Monoacylglycerophosphoethanolamine |  |  |  | 1 | 1 | 1 | 1 | 1 | 2 |
| 2-Monoacylglycerophosphoethanolamine | PE(0:0/22:6) |  |  | 8 | 8 | 6 | 5 | 2 | 4 |
| 1-Monoacylglycerophosphoethanolamine | PE(22:6/0:0) |  |  | 11 | 11 | 5 | 5 | 3 | 6 |
| Monoacylglycerophosphoinositol | LPI(16:0) |  |  | 2 | 2 | 3 | 3 |  | 12 |
| Monoacylglycerophosphoinositol | LPI(18:0) |  |  | 2 | 2 | 4 | 3 |  | 4 |
| Monoacylglycerophosphoinositol | LPI(18:0) | 2 | 3 | 27 | 28 | 40 | 35 | 2 | 39 |
| Monoacylglycerophosphoinositol | LPI(18:1) |  |  | 4 | 5 | 6 | 5 |  | 32 |
| Monoacylglycerophosphoinositol | LPI(20:4) | 0 | 1 | 4 | 5 | 6 | 5 | 1 | 8 |
| Monoacylglycerophosphoinositol | LPI(20:4) |  |  | 1 | 2 | 1 | 1 |  | 1 |
| 1-Monoetherglycerophosphocholine | PC(O-16:0/0:0) |  |  | 29 | 28 | 65 | 61 | 13 | 20 |
| 1-Monoetherglycerophosphocholine | PC(P-16:0/0:0) |  |  | 26 | 25 | 44 | 37 | 9 | 13 |
| 1-Monoetherglycerophosphocholine | PC(O-18:0/0:0) |  |  | 13 | 13 | 35 | 32 | 6 | 9 |
| 1-Monoetherglycerophosphocholine | PC(O-18:1/0:0) | 1 | 5 | 38 | 39 | 58 | 48 | 15 | 23 |
| 1-Monoetherglycerophosphocholine | PC(P-18:0/0:0) |  |  | 7 | 7 | 13 | 12 | 5 | 6 |
| 1-Monoetherglycerophosphocholine | PC(P-18:1/0:0) |  |  | 4 | 4 | 5 | 4 | 3 | 4 |
| 1-Monoetherglycerophosphocholine | PC(O-20:0/0:0) |  |  | 2 | 3 | 7 | 7 | 6 | 9 |
| 1-Monoetherglycerophosphocholine | PC(O-20:1/0:0) |  |  | 3 | 3 | 5 | 5 | 1 | 1 |
| 1-Monoetherglycerophosphocholine | PC(O-22:1/0:0) |  |  | 5 | 5 | 12 | 11 | 1 | 1 |
| 1-Monoetherglycerophosphocholine | PC(O-22:0/0:0) |  |  | 3 | 4 | 12 | 11 | 6 | 8 |
| 1-Monoetherglycerophosphocholine | PC(O-24:1/0:0) |  |  | 13 | 16 | 40 | 38 | 1 | 2 |
| 1-Monoetherglycerophosphocholine | PC(O-24:2/0:0) |  |  | 3 | 3 | 9 | 7 |  |  |
| 1-Monoetherglycerophosphoethanolamine | PE(O-16:0/0:0) |  |  | 2 | 2 | 4 | 4 | 2 | 3 |
| 1-Monoetherglycerophosphoethanolamine | PE(P-16:1/0:0) |  |  | 10 | 10 | 16 | 13 | 9 | 19 |
| 1-Monoetherglycerophosphoethanolamine | PE(P-18:0/0:0) |  |  | 17 | 17 | 36 | 33 | 7 | 12 |
| 1-Monoetherglycerophosphoethanolamine | PE(P-18:1/0:0) |  |  | 7 | 7 | 8 | 6 | 8 | 18 |
| 1-Monoetherglycerophosphoethanolamine | PE(P-20:0/0:0) |  |  | 1 | 2 | 4 | 3 | 3 | 5 |
| N-acyl ethanolamines |  |  |  |  |  |  |  | 2 | 2 |

Blank spaces in the table indicate that the lipid species was not detected.

**Supplementary Table 4.** Distribution of human antibody reactivity in the ELISA against different P116 constructs.

Reactivity was classified as follows: negative (optical density at 450 nm < 0.1) and positive (optical density at 450 nm ≥ 0.1). The number and percentage of subjects reacting to the different constructs are indicated. A chi-square test was used to compare the categorical data between groups (P≤0.001).

| Antigen | Negative | Positive |
| --- | --- | --- |
| P116 246-818 IgG | 7 (28%) | 18 (72%) |
| P116 30-957 IgG | 0 (0%) | 25 (100%) |
| P116 30-845 IgG | 0 (0%) | 25 (100%) |
